# Supplementary material
Source: PubMed Central journal article supplement (PMC8033772)
Supplement: pt1c00034_si_001.pdf [file pt1c00034_si_001.pdf]

## Supporting Information

### Combining psychedelic and mindfulness interventions: Synergies to inform clinical practice

#### AUTHOR NAMES

Jake E Payne<sup>1</sup>, Richard Chambers<sup>2</sup>, Paul Liknaitzky<sup>3,4\*</sup>

#### AUTHOR ADDRESSES

<sup>1</sup>Centre for Mental Health, Swinburne University of Technology, Melbourne, Australia

<sup>2</sup>Mindfulness Programs, Monash University, Melbourne, Australia

<sup>3</sup>Turner Institute, School of Psychological Sciences, Monash University, Melbourne,  
Australia

<sup>4</sup>Department of Psychiatry, School of Clinical Sciences, Monash University,  
Melbourne, Australia

**CORRESPONDING AUTHOR**

\*Paul Liknaitzky - Paul.L@monash.edu

**TABLE OF CONTENTS.**

**Title page**

**S-1**

**Table of contents**

**S-2**

**Scale References**

**S-3 - S-4**

## Scale References

### Determinants of Meditation Practice Inventory-Revised (DMPI-R)

- Hunt, C. A., Hoffman, M. A., Mohr, J. J., & Williams, A. I. (2020). Assessing Perceived Barriers to Meditation: the Determinants of Meditation Practice Inventory-Revised (DMPI-R). *Mindfulness*, *11*(1), 1139–1149.  
doi:10.1007/s12671-020-01308-7

### Five Facet Mindfulness Questionnaire

- Baer, R. A., Smith, G. T., Hopkins, J., Krietemeyer, J., & Toney, L. (2006). Using self report assessment methods to explore facets of mindfulness. *Assessment, 13*, 27- 45. doi: 10.1177/1073191105283504

### Meditation Depth Index

- Piron, H. (2001). The meditation depth index (MEDI) and the meditation depth questionnaire (MEDEQ). *Journal for Meditation and Meditation Research, 1*(1), 69-92. Retrieved from:[https://www.semanticscholar.org/paper/The-Meditation-Depth-Index-\(-MEDI\)- and-the-Depth-\(Piron/4fb2f6294c0c3db35411fc70abfbd793863183ca](https://www.semanticscholar.org/paper/The-Meditation-Depth-Index-(-MEDI)- and-the-Depth-(Piron/4fb2f6294c0c3db35411fc70abfbd793863183ca)

### Mindful Adherence Questionnaire (MAQ)

- Hassed, C., Flighty, A.J., Chambers, R., Hosemans, D., Bailey, N., Connaughton, S., Lee, S., & Kazantzis, N. (2020). Advancing the Assessment of Mindfulness-Based Meditation Practice: Psychometric Evaluation of the Mindfulness Adherence Questionnaire. *Cognitive Therapy and Research, 45*, 190-204. doi:10.1007/s10608-020-10150-z

### Self-Compassion Scale

- Neff, K. (2003). Self-Compassion: An Alternative Conceptualization of a Healthy Attitude Toward Oneself. *Self and Identity, 2*(2): 85-101. doi: 10.1080/15298860309032

### Compassion Scale

- Pommier, E., Neff, K. D., & Tóth-Király, I. (2020). The development and validation of the Compassion Scale. *Assessment, 27*(1), 21-39. doi: 10.1177/1073191119874108

### Warwick-Edinburgh Mental Wellbeing Scale

- Tennant, R., Hiller, L., Fishwick, R., Platt, S., Joseph, S., Weich, S., & Stewart-Brown, S. (2007). The Warwick-Edinburgh mental well-being scale

(WEMWBS): development and UK validation. *Health and Quality of life Outcomes*, 5(1), 1-13. doi:10.1186/1477-7525-5-63

#### 5-Dimensional Altered States of Consciousness Rating Scale

- Dittrich, A. (1998). The standardized psychometric assessment of altered states of consciousness (ASCs) in humans. *Pharmacopsychiatry* 31, 80–84/ doi:10.1055/s-2007-979351

#### Emotional Breakthrough Inventory

- Roseman, Leor & Haijen, Eline & Idialu-Ikato, Kelvin & Kaelen, Mendel & R, Rosalind & Carhart-Harris, Robin. (2019). Emotional breakthrough and psychedelics: Validation of the Emotional Breakthrough Inventory. *Journal of Psychopharmacology*. 33. doi10.1177/0269881119855974.

#### Persisting Effects Questionnaire

- Griffiths, R. R., Richards, W. A., McCann, U., & Jesse, R. (2006). Psilocybin can occasion mystical-type experiences having substantial and sustained personal meaning and spiritual significance. *Psychopharmacology*, 187(3), 268-283. doi: 10.1007/s00213-006-0457-5.
